# Supplementary material for: Asymmetrically substituted 5,5′-bistriazoles – nitrogen-rich materials with various energetic functionalities
Source: Royal Society of Chemistry journal article supplement (doi:10.1039/c3dt51205c), 2013-01-01
Supplement: c3dt51205c.pdf [file c3dt51205c.pdf]

# Asymmetrically substituted 5,5'-Bistriazoles – Nitrogen-Rich materials with various energetic functionalities

## Supporting Information

Alexander A. Dippold, Thomas M. Klapötke and Michaela Oswald

### Heats of Formation

In bomb calorimetric measurements nitrogen-rich highly energetic compounds tend to burn incompletely due to the trend of explosion. Oftentimes wrong heats of combustion ( $\Delta_c H$ ) and finally wrong heats of formation ( $\Delta_f H^\circ$ ) are obtained. Therefore the heats of formation of **5–7** have been calculated on the same level for better comparison. All calculations were carried out using the Gaussian 09 (revision C.01) program package.<sup>[1]</sup> The enthalpies ( $H$ ) were calculated using the complete basis set (CBS) method described by Petersson and coworkers in order to obtain very accurate values. In this study we applied the modified CBS-4M method (M referring to the use of minimal population localization) which is a re-parameterized version of the original CBS-4 method and also includes some additional empirical corrections.<sup>[2]</sup>

The enthalpies of the gas-phase species M were calculated by the atomization energy method according to Equation 1,<sup>[3]</sup> using literature values for atomic  $\Delta_f H^\circ_{(g,A)}$ .<sup>[4]</sup>

$$\Delta_f H^\circ_{(g,M)} = H^{298}_{(g,M)} - \sum H^{298}_{(g,A)} + \sum \Delta_f H^\circ_{(g,A)} \quad (1)$$

The solid-state enthalpy of formation for neutral compounds can be estimated with Trouton's rule according to Equation 2,<sup>[5]</sup> where  $T$  is either the melting point or the decomposition temperature (in K) if no melting occurs prior to decomposition.

$$\Delta_f H^\circ_{(s)} = \Delta_f H^\circ_{(g)} - \Delta_{\text{sub}} H = \Delta_f H^\circ_{(g)} - (188 / \text{J mol}^{-1} \text{K}^{-1} \times T) \quad (2)$$

Finally, the solid-state molar enthalpies of formation ( $\Delta_f H^\circ$ ) were used to calculate the solid-state energies of formation ( $\Delta_f U^\circ$ ) according to Equation 3, with  $\Delta n$  being the change of moles of gaseous components.

$$\Delta U = \Delta H - \Delta n RT \quad (3)$$

**Table S1:** CBS-4M calculation results.

| M                                                                                   | PG <sup>[a]</sup> | $-H$ / a.u. <sup>[b]</sup> | $\Delta_f H^\circ_{(g)}$ / kJ mol <sup>-1</sup> <sup>[c]</sup> | $-\Delta n$ <sup>[d]</sup> |
|-------------------------------------------------------------------------------------|-------------------|----------------------------|----------------------------------------------------------------|----------------------------|
| <b>1</b>                                                                            | C <sub>1</sub>    | 833.286389                 | 587.7                                                          | 7.5                        |
| <b>2</b>                                                                            | C <sub>1</sub>    | 778.023249                 | 526.3                                                          | 6.5                        |
| <b>3</b>                                                                            | C <sub>1</sub>    | 737.128110                 | 862.2                                                          | 6.5                        |
| <b>NNBT<sup>2-</sup>,<br/>C<sub>4</sub>HN<sub>9</sub>O<sub>4</sub><sup>2-</sup></b> | C <sub>1</sub>    | 945.400176                 | 229.1                                                          | –                          |
| <b>NH<sub>4</sub>O<sup>+</sup></b>                                                  | C <sub>s</sub>    | 131.863249                 | 164.1                                                          | –                          |
| <b>G<sup>+</sup>, CH<sub>6</sub>N<sub>3</sub><sup>+</sup></b>                       | C <sub>1</sub>    | 205.453192                 | 137.1                                                          | –                          |
| <b>TAG<sup>+</sup>, CH<sub>9</sub>N<sub>6</sub><sup>+</sup></b>                     | C <sub>3</sub>    | 371.197775                 | 208.8                                                          | –                          |
| <b>4a</b>                                                                           | –                 | –                          | 915.5                                                          | 13.0                       |
| <b>4b</b>                                                                           | –                 | –                          | 800.3                                                          | 16.0                       |
| <b>4c</b>                                                                           | –                 | –                          | 1102.1                                                         | 22.0                       |
| <b>RDX</b>                                                                          | C <sub>1</sub>    | 896.346781                 | 174.2                                                          | 9.0                        |

[a] Point group, [b] CBS-4M calculated enthalpy, [c] gas-phase enthalpy of formation, [d] change of moles of gaseous components.

**Table S2.** Literature values for atomic  $\Delta H^\circ_f$  / kcal mol<sup>-1</sup>

|   | NIST <sup>4</sup> |
|---|-------------------|
| H | 52.1              |
| C | 171.3             |
| N | 113.0             |
| O | 59.6              |

**Table S3:** Molecular volumes, lattice energies and lattice enthalpies.

|           | V <sub>M</sub> /nm <sup>3</sup> | U <sub>L</sub> /kJ mol <sup>-1</sup> | $\Delta H_L$ / kJ mol <sup>-1</sup> |
|-----------|---------------------------------|--------------------------------------|-------------------------------------|
| <b>4a</b> | 0.271                           | 1353.8                               | 1358.8                              |
| <b>4b</b> | 0.345                           | 1235.3                               | 1242.8                              |
| <b>4c</b> | 0.431                           | 1134.2                               | 1141.6                              |

## References

- [1] M. J. Frisch, G. W. Trucks, H. B. Schlegel, G. E. Scuseria, M. A. Robb, J. R. Cheeseman, G. Scalmani, V. Barone, B. Mennucci, G. A. Petersson, H. Nakatsuji, M. Caricato, X. Li, H. P. Hratchian, A. F. Izmaylov, J. Bloino, G. Zheng, J. L. Sonnenberg, M. Hada, M. Ehara, K. Toyota, R. Fukuda, J. Hasegawa, M. Ishida, T. Nakajima, Y. Honda, O. Kitao, H. Nakai, T. Vreven, J. A. Montgomery, Jr., J. E. Peralta, F. Ogliaro, M. Bearpark, J. J. Heyd, E. Brothers, K. N. Kudin, V. N. Staroverov, T. Keith, R. Kobayashi, J. Normand, K. Raghavachari, A. Rendell, J. C. Burant, S. S. Iyengar, J. Tomasi, M. Cossi, N. Rega, J. M. Millam, M. Klene, J. E. Knox, J. B. Cross, V. Bakken, C. Adamo, J. Jaramillo, R. Gomperts, R. E. Stratmann, O. Yazyev, A. J. Austin, R. Cammi, C. Pomelli, J. W. Ochterski, R. L. Martin, K. Morokuma, V. G. Zakrzewski, G. A. Voth, P. Salvador, J. J. Dannenberg, S. Dapprich, A. D. Daniels, O. Farkas, J. B. Foresman, J. V. Ortiz, J. Cioslowski, and D. J. Fox, *Gaussian 09 Revision C.01*, Gaussian, Inc., Wallingford, CT, USA, **2010**.
- [2] a) J. W. Ochterski, G. A. Petersson, J. A. Montgomery, *J. Chem. Phys.* **1996**, *104*, 2598–2619; b) J. A. Montgomery, M. J. Frisch, J. W. Ochterski, G. A. Petersson, *J. Chem. Phys.* **2000**, *112*, 6532–6542.
- [3] a) B. M. Rice, S. V. Pai, J. Hare, *Combust. Flame* **1999**, *118*, 445–458; b) B. M. Rice, J. J. Hare, *J. Phys. Chem. A* **2002**, *106*, 1770–1783; c) E. F. C. Byrd, B. M. Rice, *J. Phys. Chem. A* **2006**, *110*, 1005–1013.
- [4] a) P. J. Linstrom, W. G. Mallard (Editors), *NIST Standard Reference Database Number 69*, <http://webbook.nist.gov/chemistry> (accessed December 31, 2012); b) J. D. Cox, D. D. Wagman, V. A. Medvedev, *CODATA Key Values for Thermodynamics*, Hemisphere Publishing Corp., New York, **1984**.
- [5] a) F. Trouton, *Philos. Mag.* **1884**, *18*, 54–57; b) M. S. Westwell, M. S. Searle, D. J. Wales, D. H. Williams, *J. Am. Chem. Soc.* **1995**, *117*, 5013–5015.
